# Supplementary material
Source: publisher figshare collection journal article supplement (https://plos.figshare.com/articles/dataset/_/7726847)
Supplement: Supplementary file [file 1]

## S2 The Balloon-Windkessel model of the hemodynamic response function

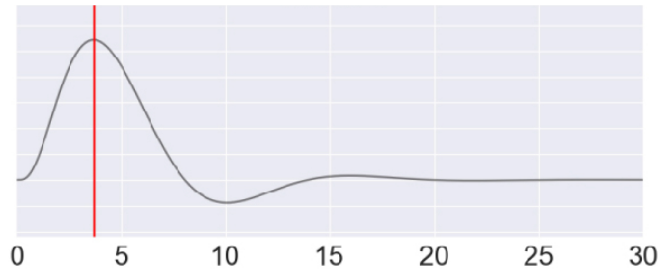

**S2 Fig A** The canonical HRF response ( $\kappa = 0.65[1/s]$ ,  $\gamma = 0.41[1/s]$ ,  $\lambda = 0.98[s]$ ,  $\alpha = 0.32$ ,  $\rho = 0.34$ ).

The classic Balloon-Windkessel model for the hemodynamic response [1, 2] reads as follows

$$\begin{cases} \dot{s}(t) &= r(t) - \kappa s(t) - \gamma(f(t) - 1), \\ \dot{f}(t) &= s(t), \\ \lambda \dot{v}(t) &= f(t)v(t)^{1/\alpha}, \\ \lambda \dot{q}(t) &= f(t)E(f(t), \rho)/\rho - v^{1/\alpha-1}(t)q(t), \end{cases} \quad (1)$$

where  $r(t)$  – the underlying, fast neuronal dynamics,  $s(t)$  – vasodilatory signal,  $f(t)$  – inflow,  $v(t)$  – blood volume,  $q(t)$  – deoxyhemoglobin content,  $E(f, \rho) = 1 - (1 - \rho)^{1/f}$ . This model contains five node-specific constants:  $\kappa$  – rate of signal decay,  $\gamma$  – rate of flow-dependent elimination,  $\lambda$  – hemodynamic transit time,  $\alpha$  – Grubb's exponent,  $\rho$  – resting oxygen extraction fraction.

Then, the following expression describes the BOLD response

$$y(t) = V_0(7\rho_i(1 - q(t)) + 2(1 - q(t)/v_i(t)) + (2\rho - 0.2)(1 - v(t))), \quad (2)$$

where  $V_0 = 0.02$  is the resting blood volume fraction. The hemodynamic parameters were set at the mean of the distributions given in [2]:  $\kappa = 0.65[1/s]$ ,  $\gamma = 0.41[1/s]$ ,  $\lambda = 0.98[s]$ ,  $\alpha = 0.32$ ,  $\rho = 0.34$ .

This generative model characterizes BOLD response  $y(t)$  in a function of fast neuronal dynamics  $r(t)$  as a system of ordinary differential equations. Effectively,  $y(t)$  can also be obtained from  $r(t)$  as a linear convolution with a kernel which describes BOLD response to a pulse stimulus  $r(t)$ , also known as a hemodynamic response function (Fig A).

## References

1. Buxton RB, Wong EC, Frank LR. Dynamics of blood flow and oxygenation changes during brain activation: the Balloon model. *Magnetic Resonance in Medicine*. 1998;39(6):855–64. doi:10.1002/mrm.1910390602.
2. Friston KJ, Harrison L, Penny W. Dynamic Causal Modeling. *NeuroImage*. 2003;19(4):1273–302. doi:10.1016/S1053-8119(03)00202-7.
